# Supplementary material for: Factors Driving Changes in Vegetation in Mt. Qomolangma (Everest): Implications for the Management of Protected Areas
Source: MDPI journal article supplement (doi:10.3390/rs13224725), 2021-11-22
Supplement: s1 [file s1]

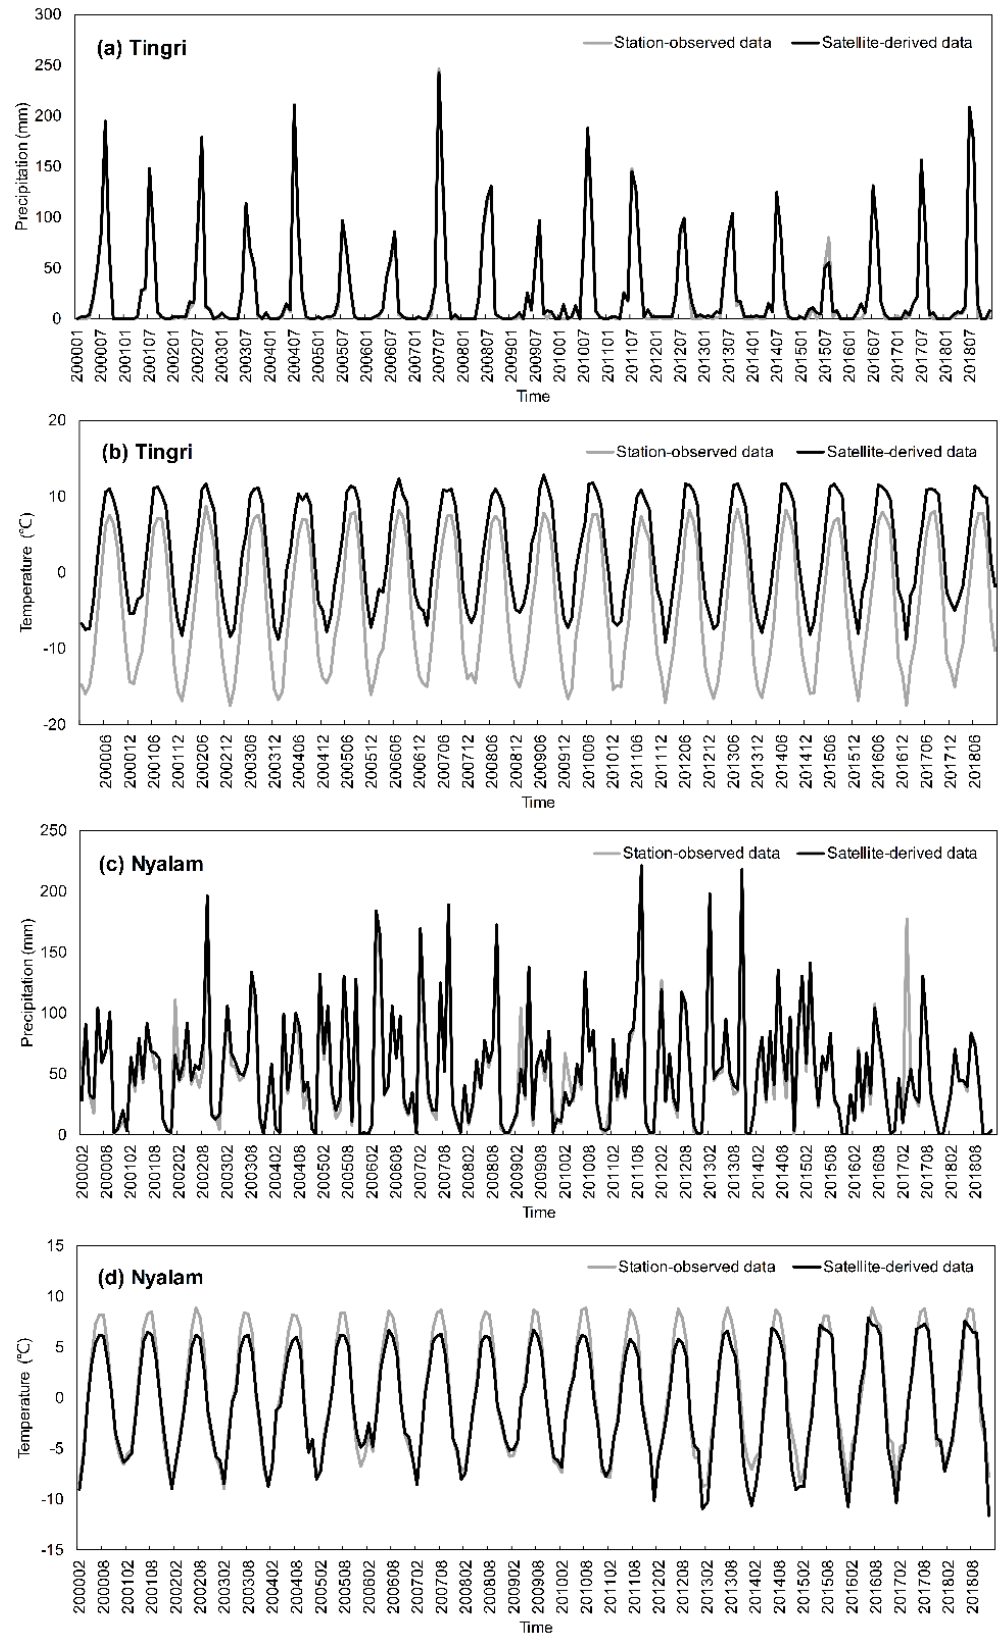

**Figure S1.** Comparison of the ground-observed climate data and the China Meteorological Forcing Dataset.

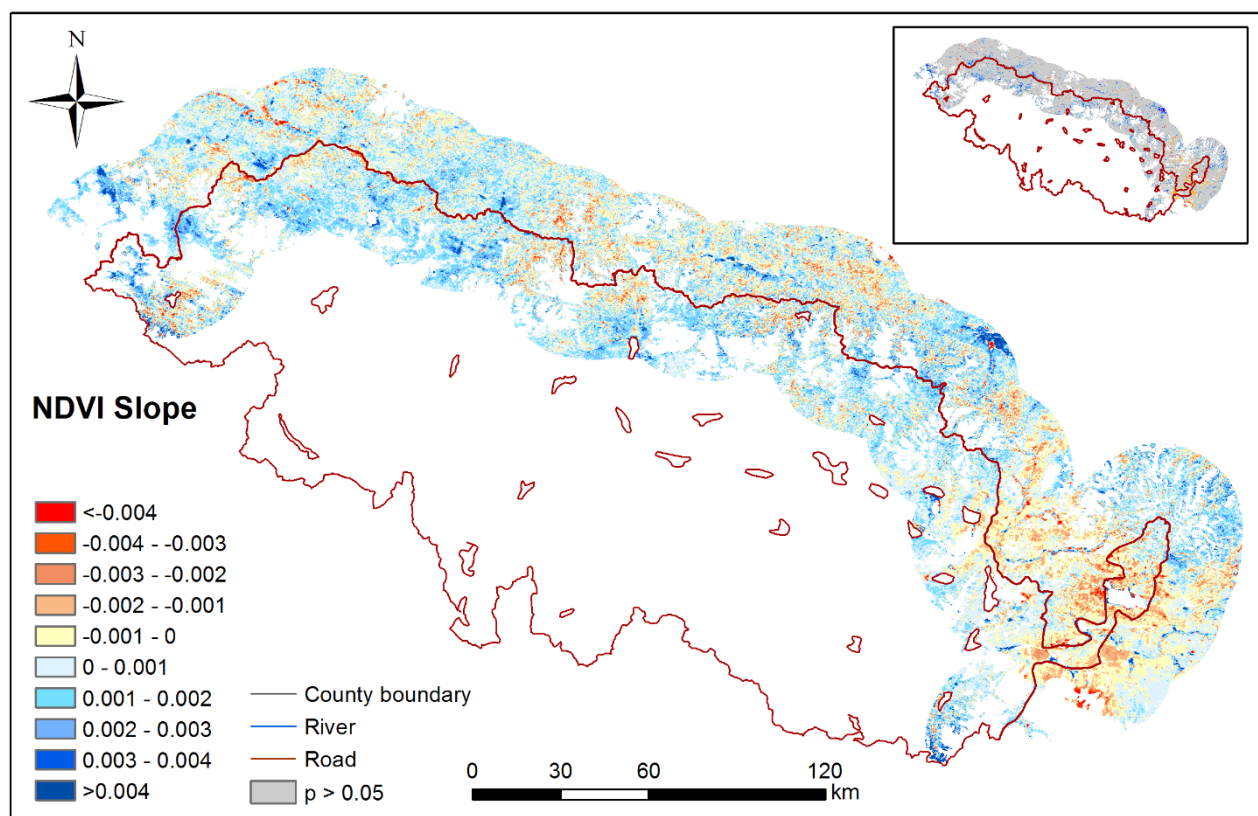

**Figure S2.** NDVI trends around the reserve boundary. Insert figures is NDVI trends with p value higher than 0.05 being masked out.
